# Supplementary material for: CSF NPTX2 reflects α-synuclein pathology and predicts disease progression in Parkinson’s disease
Source: Research Square preprint supplement (doi:10.21203/rs.3.rs-8386534/v1), 2025-12-30
Supplement: Supplementary file 1 [file 8127bea6eb2ad968e04c4118.xlsx]

## Sheet: Abbreviations
Abbreviations:
PD	Parkinson's Disease
NPTXs	Neuronal pentraxins
NPTX1	Neuronal pentraxin I
NPTX2	Neuronal pentraxin II
NPTXR	Neuronal pentraxin Receptor
Low	Low NPTX2 level (Q1)
High	High NPTX2 level(Q2-Q4)
updrs3 score	Movement Disorder Society Unified Parkinson's Disease Rating Scale III score
PIGD	postural imbalance and gait difficulty
H-Y stage	Hoehn-Yahr stage
MCI	mild cognitive impairment
MoCA	the Montreal Cognitive Assessment
JoLO	the Benton Judgment of Line Orientation
LNS	the Letter Number Sequencing
SFT	the Semantic Fluency Test
SDMT	Symbol Digit Modalities Test
HVLT	the Hopkins Verbal Learning Test
TotRec	HVLT Total Recall
DelRec	HVLT Delayed Recall
Retent	HVLT Retention
RecDisc	HVLT Recognition Discrimination
Aβ1-42	Amyloid-beta (1-42)
T-tau	total tau
P-tau	tau phosphorylated at the threonine181 position (p-tau181)
GFAP	Glial fibrillary acid protein
YKL-40	Chitinase-3-like Protein 1
sTREM2	Soluble triggering receptor expressed on myeloid cells 2
S100	S100 calcium binding protein B
IL-6	Interleukin 6
SAA	Seed Amplification Assay.
α-syn	total a-syn amounts in CSF
T50%	the time to 50% max fluorescence of α-syn SAA
TTT	the time to threshold of α-syn SAA
SLOPE	the slope of α-syn SAA
AUC	the area under the curve of α-syn SAA
Fmax	the maximum fluorescence of α-syn SAA
APOE	APOE ɛ4 carriers
Ess	Epworth Sleepiness Scale Score
Rem	REM Sleep Behavior Disorder Screening Questionnaire (RBDSQ) total score
Gds	Geriatric Depression Scale Score
Stai	State-Trait Anxiety Index (STAI) Total Score
Scopa	SCOPA-AUT Total Score
TD	tremor dominant
Ind	indeterminate
ADL	Modified Schwab & England ADL

## Sheet: List
Supplementary Tables
No	Title
Table S1	Number of data-points of longitudinal clinical assessments and biomarkers in participants with Parkinson's disease in PPMI cohort.
Table S2	Clinical characteristics, α-synuclein SAA parameters and CSF biomarkers of PD participants and controls in PPMI cohort.
Table S3	Subgroup Analyses on Baseline Cerebrospinal Fluid NPTXs Levels in PD
Table S4	Liner regression model for Associations between CSF NPTXs and PD Symptoms and Biomarkers.
Table S5	Elevated NPTX2 expression in PD dopaminergic neurons.
Table S6	Liner regression model for Associations between CSF NPTXs and α-synuclein as well as mean DAT binding ratio.
Table S7	Liner regression model with RCS for Associations between CSF NPTX2 and α-synuclein as well as mean DAT binding ratio.
Table S8	The relationship between baseline CSF NPTX2 and longitudinal α-synuclein, as well as the dopaminergic degeneration.
Table S9	Mediation of the association between CSF NPTX2 and MDS-UPDRS III by dopaminergic degeneration.
Table S10	Longitudinal Associations Between CSF NPTXs and PD Symptoms.
Table S11	Subgroup Analyses on Longitudinal Associations Between CSF NPTX2 and PD Symptoms.
Table S12	Cox Proportional Hazards Models for Associations Between CSF NPTXs, Motor Progression, Dementia Risk, and the milestones of Parkinson's Disease progression.
Table S13	Cox regression model with RCS for Association between CSF NPTX2 witih the milestones of Parkinson's Disease progression.
Table S14	Baseline CSF NPTXs predict motor subtype conversion.
Table S15	Logistic regression model for Associations between CSF NPTXs and motor subtype conversions.
Table S16	Cox regression model for Associations between CSF NPTXs and motor subtype conversions.
Table S17	Associations between CSF NPTXs and the Brain cortical thickness.
Table S18	Associations between CSF NPTXs and the Brain cortical surface area.
Table S19	Associations between CSF NPTXs and the Brain subcortical volumes.
Table S20	Mediation of the association between CSF NPTX2 and MDS-UPDRS III by brain structure.
Table S21	Liner regression model with RCS for Associations between CSF NPTX2 and CSF biomarkers.
Table S22	Mediation of the association between CSF NPTXs and tau pathology by sTREM2 and YKL-40.
Table S23	Longitudinal Associations Between CSF NPTXs and Biomarkers in the PPMI Cohort
Table S24	Clinical, demographic and neurodegenerative biomarkers of PD participants and controls in BioFIND cohort .
Table S25	Liner regression model for Associations between CSF NPTX2 and PD Symptoms and neurodegenerative biomarkers in BioFIND cohort.

## Sheet: TableS1
Assessments	Baseline	Year 1	Year 2	Year 3	Year 4	Year 5	Year 6	Year 7	Year 8	Year 9	Year 10	Year 11	Year 12	Year 13	Year 14
Hoehn-Yahr stage	528	424	359	327	312	280	228	215	146	120	128	95	61	24	2
UPDRS I	527	488	461	442	408	384	309	277	203	176	190	157	121	47	6
UPDRS II	527	488	459	441	409	384	309	280	200	175	190	157	123	47	6
UPDRS III	528	422	355	322	307	276	226	211	139	113	117	85	58	19	1
UPDRS total score	527	421	354	321	305	276	222	210	136	113	116	83	55	19	1
Tremors	528	406	348	326	311	279	230	215	144	124	129	94	60	24	2
Bradykinesia	528	405	347	325	309	279	228	214	144	125	127	94	60	23	2
Rigidity	528	404	344	319	307	275	228	211	137	115	117	87	57	20	1
PIGD	528	404	344	319	307	275	228	211	137	115	117	87	57	20	1
MoCA	528	486	454	427	398	372	308	270	188	153	168	141	115	40	3
JoLO	526	486	451	426	396	368	300	264	178	150	164	138	106	39	2
HVLT Total Recall	527	486	455	427	397	370	305	269	183	149	164	138	106	40	2
HVLT Delayed Recall	527	486	455	426	396	370	304	268	182	149	164	138	106	40	2
HVLT Retention	527	486	455	426	396	370	304	268	182	149	164	138	106	40	2
HVLT Recognition Discrimination	525	485	455	425	395	370	303	267	182	149	164	138	106	40	2
LNS	527	485	453	424	397	371	307	268	181	151	163	138	106	40	2
SDMT	527	487	455	425	397	370	304	266	180	149	165	137	106	40	2
SFT	527	485	455	427	398	371	306	268	181	151	165	138	106	40	2
Ess	527	489	459	439	409	382	312	279	202	174	190	158	121	47	6
Rem	525	488	459	437	409	382	313	276	203	174	190	156	123	47	6
Gds	527	488	459	438	409	383	313	277	203	174	189	155	121	47	6
Stai	527	489	459	438	407	382	313	277	203	174	190	158	122	46	6
Scopa	519	484	458	437	408	382	313	276	200	173	187	156	121	46	6
α-syn	446	334	288	212	0	0	0	0	0	0	0	0	0	0	0
Aβ1-42	479	361	329	278	223	185	0	0	0	0	0	0	0	0	0
T-au	511	387	351	304	241	191	0	0	0	0	0	0	0	0	0
P-tau	478	351	320	285	226	182	0	0	0	0	0	0	0	0	0
NfL	207	191	192	148	139	0	0	0	0	0	0	0	0	0	0
S100	207	191	192	147	139	0	0	0	0	0	0	0	0	0	0
sTREM2	207	192	192	148	139	0	0	0	0	0	0	0	0	0	0
YKL-40	207	192	192	148	139	0	0	0	0	0	0	0	0	0	0
GFAP	207	192	192	148	139	0	0	0	0	0	0	0	0	0	0
IL-6	200	188	190	144	135	0	0	0	0	0	0	0	0	0	0
Caudate	514	341	410	11	329	8	0	0	0	0	0	0	0	0	0
Putamen	514	341	410	11	329	8	0	0	0	0	0	0	0	0	0
Striatum	514	341	410	11	329	8	0	0	0	0	0	0	0	0	0

## Sheet: TableS2
Clinical characteristics, α-synuclein SAA parameters and CSF biomarkers of PD participants and controls in PPMI cohort.
Variables	Healthy Control	Patients with PD	P-value	Baseline NPTX2 level		P-value
	(n=178)	(n=528)		Low (n=132)	High(n=396)
Motor assessments
tremors	0.24±0.69	4.34±3.41	<0.001	4.59± 3.63	4.25± 3.33	0.417
Bradykinesia	0.50±1.23	9.89±5.55	<0.001	10.48± 5.78	9.70± 5.46	0.197
Rigidity	0.21±0.66	3.79±2.66	<0.001	4.33± 2.70	3.61± 2.62	0.004
PIGD	0.03±0.18	0.75±0.80	<0.001	0.77± 0.83	0.74± 0.79	0.858
Cognitive assessments
JoLO	13.08±2.02	12.73±2.11	0.032	12.46± 2.16	12.81± 2.09	0.073
LNS	10.95±2.62	10.58±2.67	0.173	10.21± 2.65	10.70± 2.66	0.064
SFT	10.95±2.62	10.58±2.67	0.169	50.08± 10.82	51.19± 9.97	0.338
SDMT	47.05±10.75	41.56±9.96	<0.001	39.13± 11.15	42.37± 9.40	0.001
TotRec	49.40±9.93	46.20±10.68	<0.001	44.05± 11.17	46.92± 10.42	0.004
DelRec	49.26±10.53	45.13±11.13	<0.001	42.91± 11.07	45.88± 11.07	0.004
Retent	49.91±10.59	46.82±11.44	0.001	45.64± 12.71	47.21± 10.97	0.277
RecDisc	48.60±10.77	46.12±10.65	0.003	43.03± 11.97	47.15± 9.97	0.001
α-synuclein Seed Amplification Assay
SLOPE (RFU/s)	29.03±15.74	43.40±170.01	0.025	33.52± 11.13	46.80± 196.92	0.441
AUC (%*s)	21746818.47±8743046.53	25758167.34±4456828.48	0.056	26480974.91± 4647040.78	25510039.37± 4371006.99	0.004
Fmax (RFU)	7361.30±21383.00	77471.80±35078.39	<0.001	77312.50± 38308.21	77528.24± 33931.61	0.628
CSF biomarkers
Aβ1-42 (pg/ml)	835.69±275.99	814.46±284.72	0.338	605.17± 217.03	893.25± 266.94	<0.001
T-tau (pg/ml)	192.56±81.26	166.99±57.69	<0.001	127.43± 36.73	179.13± 57.54	<0.001
P-tau (pg/ml)	17.59±8.56	14.61±5.18	<0.001	11.49± 3.47	15.38± 5.24	<0.001
α-syn (pg/ml)	1702.51±758.81	1488.05±667.37	<0.001	1013.47± 314.41	1654.87± 678.64	<0.001
NFL (pg/ml)	97.38±54.83	100.42±55.72	0.749	98.28± 47.46	101.12± 58.29	0.791
GFAP (ng/ml)	6.89±3.40	6.34±3.02	0.218	6.21± 3.06	6.38± 3.02	0.701
YKL-40 (ng/ml)	138.35±60.63	123.50±46.50	0.069	109.69± 41.54	128.01± 47.27	0.018
S100 (ng/ml)	1.15±0.30	1.10±0.30	0.082	1.06± 0.28	1.12± 0.31	0.214
sTREM2 (ng/ml)	7.31±2.78	6.89±2.14	0.305	6.35± 1.97	7.06± 2.17	0.048
IL-6 (pg/ml)	4.26±4.90	4.11±3.02	0.737	3.78± 1.68	4.22± 3.34	0.945
Categorical variables are reported as numbers and percentages; continuous variables are reported as means ± standard deviations.
Student's t-test was used for continuous variables and chi-square test was used for categorical variables.
Abbreviations:
PD, Parkinson's Disease; Low, Low NPTX2 level (Q1); High, High NPTX2 level(Q2-Q4);PIGD, postural imbalance and gait difficulty;
SLOPE, the slope of α-syn SAA; AUC, the area under the curve of α-syn SAA; Fmax, the maximum fluorescence of α-syn SAA; SAA, Seed Amplification Assay.
TotRec, HVLT Immediate/Total Recall t-score; DelRec, HVLT Delayed Recall t-score; Retent, HVLT Retention t-score;
RecDisc, HVLT Discrimination Recognition Index t-score; JoLO, the Benton Judgment of Line Orientation, LNS, the Letter Number Sequencing;
SFT, the Semantic Fluency Test; SDMT, Symbol Digit Modalities Test.
NPTX1, Neuronal pentraxin I; NPTX2, Neuronal pentraxin II; NPTXR, Neuronal pentraxin Receptor;
Aβ1-42, Amyloid-beta (1-42); T-tau, total tau; P-tau, tau phosphorylated at the threonine181 position (p-tau181);
GFAP, Glial fibrillary acid protein; YKL-40, Chitinase-3-like Protein 1; sTREM2, Soluble triggering receptor expressed on myeloid cells 2;
S100, S100 calcium binding protein B; IL-6, Interleukin 6.

## Sheet: TableS3
Subgroup Analyses on Baseline Cerebrospinal Fluid NPTXs Levels in PD
Overall		NPTX1		NPTX2		NPTXR
		mean±sd	P_value	mean±sd	P_value	mean±sd	P_value
Age	≤ 65 years (n = 313)	15.47±0.31		11.72±0.48		15.86±0.21
	> 65 years (n = 215)	15.39±0.35	0.004	11.59±0.54	0.004	15.82±0.25	0.017
Gender	Female (n =194 )	15.55±0.28		11.81±0.45		15.92±0.18
	Male (n =334 )	15.37±0.33	<0.001	11.58±0.53	<0.001	15.80±0.24	<0.001
Duration	Duration ≤2 years(n=441）	15.43±0.32		11.66±0.52		15.84±0.23
	Duration >2 years(n=87)	15.47±0.34	0.311	11.69±0.45	0.572	15.87±0.22	0.285
APOE ɛ4 carriers	Non-carrier(n=400)	15.44±0.32		11.69±0.51		15.85±0.23
	Carrier(n=128)	15.43±0.34	0.782	11.58±0.52	0.03	15.83±0.23	0.471
Aβ1-42	A-(n=311)	15.49±0.27		11.76±0.41		15.88±0.20
	A+(n=168)	15.25±0.34	<0.001	11.33±0.50	<0.001	15.75±0.50	<0.001
P-tau	T-(n=450)	15.46±0.30		11.69±0.45		15.86±0.21
	T+(n=28)	15.66±0.21	<0.001	12.27±0.43	<0.001	15.92±0.14	0.148
H-Y stage	1 (n = 210)	15.44±0.34		11.69±0.54		15.86±0.23
	2 (n = 318)	15.43±0.32	0.584	11.65±0.49	0.316	15.83±0.23	0.167
Cognition	NC(n=348)	15.46±0.31		11.70±0.49		15.86±0.21
	MCI(n=180)	15.39±0.35	0.04	11.60±0.55	0.044	15.82±0.26	0.135
Continuous variables are reported as means ± standard deviations.
P value was assessed by Student's t-tests among subgroups.
Abbreviations:SD, standard deviation;
APOE, apolipoprotein E gene;Aβ1-42=Amyloid-beta (1-42);P-tau=tau phosphorylated at the threonine181 position (p-tau181);
H-Y stage,Hoehn-Yahr stage;NC normal cognition;MCI mild cognitive impairment;

## Sheet: TableS4
Liner regression model for Associations between CSF NPTXs and PD Symptoms and Biomarkers.
Independent	Dependent	Beta	SE	T_value	P_value	CI_lower	CI_upper
High vs. Low NPTX2	Aβ1-42	1.12512	0.0943654	11.9231	8.25273e-29	0.939694	1.31056
High vs. Low NPTX2	Bradykinesia	-0.633606	0.47486	-1.3343	0.182689	-1.56649	0.299274
High vs. Low NPTX2	Ess	-0.0577085	0.389859	-0.148024	0.882382	-0.823612	0.708195
High vs. Low NPTX2	Gds	-0.625311	0.26795	-2.33368	0.0199947	-1.15172	-0.0989056
High vs. Low NPTX2	GFAP	0.197556	0.145362	1.35907	0.175671	-0.0890991	0.484212
High vs. Low NPTX2	HVLT Delayed Recall	1.3883	1.04381	1.33004	0.184093	-0.662324	3.43893
High vs. Low NPTX2	HVLT Recognition Discrimination	2.58327	1.03045	2.50693	0.0124853	0.558867	4.60767
High vs. Low NPTX2	HVLT Retention	0.401023	1.14878	0.349086	0.727167	-1.85583	2.65787
High vs. Low NPTX2	HVLT Total Recall	1.7707	1.01202	1.74967	0.0807686	-0.217476	3.75887
High vs. Low NPTX2	IL-6	0.0935328	0.161495	0.57917	0.563157	-0.225009	0.412075
High vs. Low NPTX2	JoLO	0.405039	0.205116	1.97469	0.0488363	0.00207482	0.808004
High vs. Low NPTX2	Lns	0.205779	0.246305	0.835466	0.403841	-0.278102	0.68966
High vs. Low NPTX2	moca	1.81707e-16	9.84918e-17	1.8449	0.0656229	-1.17851e-17	3.752e-16
High vs. Low NPTX2	NfL	0.177781	0.12302	1.44514	0.150001	-0.064817	0.420378
High vs. Low NPTX2	PIGD	-0.021555	0.0784996	-0.274587	0.783743	-0.17577	0.13266
High vs. Low NPTX2	P-tau	0.842378	0.0849984	9.91052	3.81909e-21	0.675353	1.0094
High vs. Low NPTX2	Rem	-0.405257	0.289252	-1.40105	0.161801	-0.973515	0.163002
High vs. Low NPTX2	Rigidity	-0.530321	0.246908	-2.14785	0.032187	-1.01538	-0.0452617
High vs. Low NPTX2	S100	0.226857	0.161436	1.40525	0.161515	-0.0914974	0.545212
High vs. Low NPTX2	Scopa	-1.28561	0.684361	-1.87855	0.0608772	-2.63013	0.0589135
High vs. Low NPTX2	SDMTOTAL	1.33949	0.86998	1.53968	0.124249	-0.369637	3.04862
High vs. Low NPTX2	SFT	0.920509	1.03645	0.888135	0.374881	-1.11566	2.95668
High vs. Low NPTX2	Stai	-4.73987	1.90564	-2.48728	0.0131867	-8.48363	-0.996108
High vs. Low NPTX2	sTREM2	0.381398	0.125106	3.04861	0.0026131	0.134688	0.628109
High vs. Low NPTX2	Tremors	-0.123116	0.348895	-0.352873	0.724327	-0.808533	0.562302
High vs. Low NPTX2	T-tau	0.986166	0.0769212	12.8205	9.67674e-33	0.835038	1.13729
High vs. Low NPTX2	UPDRS I	-0.568942	0.451635	-1.25974	0.208331	-1.4562	0.318316
High vs. Low NPTX2	UPDRS II	-0.580319	0.427888	-1.35624	0.175613	-1.42092	0.260287
High vs. Low NPTX2	UPDRS III	-1.72259	0.806234	-2.13659	0.0330976	-3.30647	-0.138714
High vs. Low NPTX2	YKL-40	0.503859	0.117193	4.29939	2.68623e-05	0.272752	0.734966
NPTX1	Aβ1-42	0.557797	0.0490544	11.371	1.25351e-26	0.461403	0.65419
NPTX1	Bradykinesia	0.0977065	0.234996	0.415779	0.677743	-0.363952	0.559365
NPTX1	Ess	0.135212	0.191965	0.70436	0.481526	-0.241915	0.51234
NPTX1	Gds	-0.277693	0.131763	-2.10751	0.0355543	-0.53655	-0.0188352
NPTX1	GFAP	0.198334	0.0738579	2.68535	0.00786007	0.0526852	0.343983
NPTX1	HVLT Delayed Recall	0.585538	0.514481	1.13811	0.2556	-0.425193	1.59627
NPTX1	HVLT Recognition Discrimination	0.409474	0.509763	0.803264	0.422192	-0.591996	1.41094
NPTX1	HVLT Retention	0.0336077	0.566026	0.0593748	0.952677	-1.07839	1.1456
NPTX1	HVLT Total Recall	1.32185	0.496667	2.66144	0.00802273	0.346116	2.29758
NPTX1	IL-6	-0.0613641	0.0821413	-0.747055	0.455949	-0.223385	0.100657
NPTX1	JoLO	0.186121	0.101126	1.84048	0.0662723	-0.0125493	0.384791
NPTX1	Lns	0.146534	0.121256	1.20847	0.227419	-0.0916809	0.384749
NPTX1	moca	3.72507e-17	6.88565e-17	0.54099	0.588747	-9.80217e-17	1.72523e-16
NPTX1	NfL	0.108445	0.0632045	1.71578	0.0877668	-0.0161955	0.233085
NPTX1	PIGD	0.0487351	0.0387315	1.25828	0.208855	-0.0273543	0.124824
NPTX1	P-tau	0.430261	0.0418367	10.2843	1.67173e-22	0.34805	0.512472
NPTX1	Rem	-0.184058	0.141889	-1.2972	0.195143	-0.462809	0.0946934
NPTX1	Rigidity	-0.00255803	0.12254	-0.020875	0.983353	-0.243292	0.238176
NPTX1	S100	0.344883	0.0798556	4.31883	2.47888e-05	0.187406	0.502359
NPTX1	Scopa	-0.75996	0.342015	-2.22201	0.0267217	-1.4319	-0.088025
NPTX1	SDMTOTAL	1.03462	0.427172	2.42202	0.0157773	0.195414	1.87383
NPTX1	SFT	0.891514	0.509504	1.74977	0.0807517	-0.109439	1.89247
NPTX1	Stai	-2.15583	0.940056	-2.2933	0.0222314	-4.00263	-0.309028
NPTX1	sTREM2	0.282428	0.0627772	4.49889	1.16315e-05	0.15863	0.406226
NPTX1	Tremors	-0.103905	0.172354	-0.602861	0.546864	-0.4425	0.23469
NPTX1	T-tau	0.467421	0.0400441	11.6726	5.16811e-28	0.388746	0.546096
NPTX1	UPDRS I	-0.343595	0.222593	-1.5436	0.123296	-0.780893	0.0937025
NPTX1	UPDRS II	-0.340866	0.211783	-1.60951	0.108116	-0.756926	0.0751951
NPTX1	UPDRS III	-0.0759206	0.400101	-0.189754	0.849576	-0.861933	0.710092
NPTX1	YKL-40	0.272491	0.0600478	4.53791	9.843e-06	0.154076	0.390907
NPTX2	Aβ1-42	0.642731	0.0443506	14.4921	1.35676e-39	0.55558	0.729881
NPTX2	Bradykinesia	-0.339827	0.218416	-1.55587	0.120347	-0.768913	0.0892594
NPTX2	Ess	0.0879651	0.17874	0.492139	0.62283	-0.263182	0.439112
NPTX2	Gds	-0.273218	0.122913	-2.22285	0.0266578	-0.514689	-0.0317466
NPTX2	GFAP	0.10123	0.0670508	1.50976	0.1327	-0.030995	0.233456
NPTX2	HVLT Delayed Recall	0.820906	0.478887	1.7142	0.0870917	-0.119896	1.76171
NPTX2	HVLT Recognition Discrimination	1.51841	0.47084	3.22489	0.0013402	0.593403	2.44341
NPTX2	HVLT Retention	0.207435	0.527623	0.39315	0.694371	-0.829113	1.24398
NPTX2	HVLT Total Recall	1.47642	0.461654	3.1981	0.0014681	0.569468	2.38337
NPTX2	IL-6	0.154876	0.0730971	2.11877	0.0354026	0.0106944	0.299057
NPTX2	JoLO	0.28148	0.0937389	3.00281	0.00280474	0.097323	0.465636
NPTX2	Lns	0.255113	0.112648	2.26469	0.0239448	0.0338088	0.476416
NPTX2	moca	-3.3e-17	8.80774e-17	-0.374846	0.707928	-2.06e-16	1.40017e-16
NPTX2	NfL	0.137828	0.0562591	2.44988	0.0151592	0.0268841	0.248772
NPTX2	PIGD	0.015178	0.0361252	0.420151	0.674549	-0.0557913	0.0861473
NPTX2	P-tau	0.633308	0.0308896	20.5023	3.95938e-67	0.572609	0.694008
NPTX2	Rem	-0.187902	0.131966	-1.42387	0.155091	-0.447159	0.071356
NPTX2	Rigidity	-0.114489	0.114029	-1.00403	0.315832	-0.338504	0.109526
NPTX2	S100	0.153307	0.0741203	2.06836	0.0399056	0.0071409	0.299474
NPTX2	Scopa	-0.870056	0.313516	-2.77515	0.0057205	-1.486	-0.254111
NPTX2	SDMTOTAL	1.30438	0.396371	3.2908	0.00106723	0.52568	2.08307
NPTX2	SFT	1.19915	0.473481	2.53262	0.0116162	0.268963	2.12933
NPTX2	Stai	-2.59328	0.871844	-2.97448	0.00307201	-4.30607	-0.880488
NPTX2	sTREM2	0.27654	0.0557473	4.96059	1.50906e-06	0.166605	0.386474
NPTX2	Tremors	0.124291	0.160503	0.774384	0.439056	-0.191023	0.439604
NPTX2	T-tau	0.649152	0.0290715	22.3295	3.58078e-77	0.592035	0.706269
NPTX2	UPDRS I	-0.244486	0.207347	-1.17911	0.238896	-0.651832	0.162861
NPTX2	UPDRS II	-0.475317	0.196473	-2.41924	0.0158969	-0.861301	-0.0893328
NPTX2	UPDRS III	-0.47566	0.372103	-1.2783	0.201713	-1.20667	0.25535
NPTX2	YKL-40	0.337024	0.0512668	6.57394	4.25137e-10	0.235926	0.438123
NPTXR	Aβ1-42	0.473166	0.0647004	7.31319	1.13625e-12	0.346028	0.600305
NPTXR	Bradykinesia	-0.0612557	0.296218	-0.206793	0.836253	-0.643187	0.520675
NPTXR	Ess	-0.19774	0.241728	-0.81803	0.413717	-0.67263	0.277149
NPTXR	Gds	-0.408476	0.165997	-2.46075	0.0141906	-0.734588	-0.0823649
NPTXR	GFAP	0.159657	0.101674	1.57028	0.117947	-0.0408464	0.360161
NPTXR	HVLT Delayed Recall	1.10209	0.647186	1.7029	0.0891874	-0.169343	2.37353
NPTXR	HVLT Recognition Discrimination	1.847	0.637945	2.89524	0.00394955	0.593708	3.1003
NPTXR	HVLT Retention	0.572232	0.712686	0.802924	0.422388	-0.827884	1.97235
NPTXR	HVLT Total Recall	1.84294	0.62478	2.94974	0.00332451	0.615518	3.07036
NPTXR	IL-6	-0.00557803	0.111922	-0.0498387	0.960303	-0.226339	0.215183
NPTXR	JoLO	0.39567	0.126727	3.12223	0.00189551	0.146706	0.644633
NPTXR	Lns	0.166352	0.152809	1.08863	0.276826	-0.133851	0.466556
NPTXR	moca	-1.89928e-17	1.61327e-16	-0.117729	0.906328	-3.35928e-16	2.97942e-16
NPTXR	NfL	-0.0407305	0.0865854	-0.470408	0.638581	-0.211478	0.130017
NPTXR	PIGD	0.0412858	0.0488565	0.845043	0.398475	-0.0546945	0.137266
NPTXR	P-tau	0.334832	0.0559016	5.98966	4.19572e-09	0.224983	0.444681
NPTXR	Rem	-0.534486	0.177112	-3.01779	0.0026723	-0.882436	-0.186535
NPTXR	Rigidity	-0.110054	0.15437	-0.712926	0.476211	-0.413319	0.19321
NPTXR	S100	0.203453	0.112731	1.80476	0.0726316	-0.0188551	0.425762
NPTXR	Scopa	-1.08649	0.421819	-2.57574	0.0102836	-1.91521	-0.257774
NPTXR	SDMTOTAL	1.58006	0.536753	2.94373	0.00338862	0.525571	2.63454
NPTXR	SFT	1.44915	0.640652	2.26199	0.0241126	0.190546	2.70775
NPTXR	Stai	-4.08377	1.17564	-3.47364	0.000556527	-6.3934	-1.77414
NPTXR	sTREM2	0.249792	0.0879002	2.84177	0.00495599	0.0764516	0.423133
NPTXR	Tremors	-0.234899	0.21706	-1.08219	0.279672	-0.661321	0.191523
NPTXR	T-tau	0.431357	0.0525566	8.20746	1.92487e-15	0.328098	0.534615
NPTXR	UPDRS I	-0.489359	0.280004	-1.74768	0.0811126	-1.03945	0.0607274
NPTXR	UPDRS II	-0.724784	0.265338	-2.73155	0.00651915	-1.24606	-0.203511
NPTXR	UPDRS III	-0.456948	0.503892	-0.906838	0.364913	-1.44686	0.532966
NPTXR	YKL-40	0.249241	0.083998	2.96723	0.00337523	0.0835955	0.414887

## Sheet: TableS5
Elevated NPTX2 expression in PD dopaminergic neurons.
	DA_subtype	primerid	Pr(>Chisq)	coef	ci.hi	ci.lo	z	fdr
1696	CALB1_CALCR	NPTX2	0.000755328	0.414151	0.646811	0.181491	3.48887	0.00165406
6493	CALB1_GEM	NPTX2	8.88192e-36	1.86041	2.15661	1.5642	12.31	4.82083e-34
12513	CALB1_RBP4	NPTX2	2.29888e-12	1.28825	1.66505	0.91144	6.70083	4.53763e-11

## Sheet: TableS6
Liner regression model for Associations between CSF NPTXs and α-synuclein as well as mean DAT binding ratio.
Independent	Dependent	Beta	Beta_std	SE	SE_std	T_value	P_value	CI_lower	CI_upper	CI_lower_std	CI_upper_std
NPTX1	Caudate	0.00762192	0.0121492	0.0281271	0.0448341	0.270981	0.786516	-0.0476383	0.0628822	-0.0759347	0.100233
NPTX1	Putamen	0.00185518	0.00548171	0.0151428	0.044744	0.122513	0.902542	-0.0278953	0.0316056	-0.0824252	0.0933886
NPTX1	Striatum	0.00473855	0.0104539	0.0202511	0.0446765	0.23399	0.815087	-0.035048	0.0445251	-0.0773204	0.0982281
NPTX1	T50	2.74202	0.192474	0.792691	0.0556423	3.45912	0.00060843	1.18301	4.30102	0.0830405	0.301907
NPTX1	TTT	2.91458	0.189426	0.855634	0.0556099	3.40634	0.0007345	1.23178	4.59738	0.0800568	0.298796
NPTX1	α-syn	0.568941	0.536244	0.0423957	0.0399592	13.4198	1.227e-34	0.485616	0.652265	0.457708	0.614779
NPTX1	Fmax	-1161.89	-0.0296265	2043.49	0.0521061	-0.568579	0.569979	-5179.93	2856.15	-0.132081	0.0728277
NPTX1	AUC	-929978	-0.186639	277404	0.0556727	-3.35243	0.000888109	-1.47556e+06	-384400	-0.296132	-0.0771457
NPTX1	SLOPE	6.86449	0.0361145	10.7362	0.0564838	0.639378	0.522993	-14.2507	27.9797	-0.0749737	0.147203
NPTX2	Caudate	0.0663939	0.111912	0.0261558	0.0440874	2.5384	0.0114346	0.0150066	0.117781	0.0252947	0.198529
NPTX2	Putamen	0.0341811	0.106802	0.0140883	0.0440202	2.4262	0.0156062	0.00650232	0.06186	0.0203171	0.193287
NPTX2	Striatum	0.0502875	0.117315	0.0188186	0.0439018	2.67222	0.00777808	0.0133153	0.0872597	0.0310632	0.203568
NPTX2	T50	3.24032	0.240521	0.715193	0.0530869	4.53069	8.06342e-06	1.83373	4.64691	0.136113	0.344928
NPTX2	TTT	3.4684	0.238373	0.771949	0.0530538	4.49304	9.53684e-06	1.95019	4.98661	0.134031	0.342715
NPTX2	α-syn	0.719555	0.717171	0.0322405	0.0321337	22.3183	3.01639e-74	0.65619	0.78292	0.654015	0.780326
NPTX2	Fmax	-3010.41	-0.0811718	1868.81	0.0503899	-1.61087	0.108042	-6684.98	664.15	-0.180251	0.0179079
NPTX2	AUC	-1.10503e+06	-0.234512	250387	0.0531379	-4.41328	1.35571e-05	-1.59747e+06	-612584	-0.33902	-0.130005
NPTX2	SLOPE	13.7078	0.0762613	9.77827	0.0543999	1.40186	0.161837	-5.52339	32.939	-0.0307285	0.183251
NPTXR	Caudate	0.0749444	0.0941945	0.0355757	0.0447136	2.10662	0.0356423	0.00505018	0.144839	0.00634736	0.182042
NPTXR	Putamen	0.0282119	0.0657302	0.0191946	0.044721	1.46978	0.142242	-0.00949906	0.0659229	-0.0221316	0.153592
NPTXR	Striatum	0.0515782	0.0897222	0.0256231	0.0445724	2.01295	0.0446488	0.00123732	0.101919	0.00215236	0.177292
NPTXR	T50	1.75535	0.0971557	1.0051	0.0556304	1.74645	0.0816055	-0.221402	3.73211	-0.0122542	0.206566
NPTXR	TTT	1.95959	0.100423	1.08403	0.0555534	1.80769	0.0715089	-0.172406	4.09159	-0.00883524	0.209681
NPTXR	α-syn	0.555479	0.412825	0.0588047	0.0437029	9.44617	2.12217e-19	0.439904	0.671053	0.326931	0.498718
NPTXR	Fmax	-327.804	-0.00659072	2581.92	0.0519113	-0.126961	0.899039	-5404.54	4748.93	-0.108662	0.0954803
NPTXR	AUC	-680988	-0.107763	351033	0.0555495	-1.93995	0.0531837	-1.37137e+06	9398	-0.217014	0.00148719
NPTXR	SLOPE	14.8347	0.0615397	13.4298	0.0557117	1.10461	0.270084	-11.5781	41.2475	-0.0480301	0.171109
High vs. Low NPTX2	Caudate	0.151723	0.117191	0.0567211	0.0438112	2.6749	0.00771707	0.0402856	0.263161	0.0311165	0.203265
High vs. Low NPTX2	Putamen	0.0865792	0.123965	0.0305085	0.0436824	2.83787	0.00472389	0.0266403	0.146518	0.0381439	0.209787
High vs. Low NPTX2	Striatum	0.119151	0.127376	0.0407827	0.0435978	2.92161	0.00363786	0.039027	0.199276	0.0417209	0.213031
High vs. Low NPTX2	T50	3.71586	0.126392	1.57809	0.0536772	2.35466	0.0190883	0.612192	6.81953	0.0208231	0.23196
High vs. Low NPTX2	TTT	4.08814	0.12875	1.70201	0.0536024	2.40194	0.0168258	0.740745	7.43553	0.0233287	0.234171
High vs. Low NPTX2	α-syn	1.13324	0.517578	0.0876622	0.0400373	12.9274	1.31146e-32	0.960953	1.30553	0.438889	0.596267
High vs. Low NPTX2	Fmax	-28.1541	-0.000347868	4095.28	0.0506007	-0.00687477	0.994518	-8080.54	8024.23	-0.0998419	0.0991462
High vs. Low NPTX2	AUC	-1.24493e+06	-0.121069	552060	0.0536874	-2.25507	0.0247427	-2.33069e+06	-159184	-0.226658	-0.0154805
High vs. Low NPTX2	SLOPE	18.3688	0.0468285	21.174	0.0539799	0.867517	0.38625	-23.2746	60.0121	-0.0593352	0.152992

## Sheet: TableS7
Liner regression model with RCS for Associations between CSF NPTX2 and α-synuclein as well as mean DAT binding ratio.
Dependent	Overall_P	Nonlinear_P
α-syn	<0.001	0.00155833
αS-SAA T50%	<0.001	0.31698
αS-SAA TTT	<0.001	0.355593
Striatum	0.00605268	0.0729831
Putamen	0.0283879	0.235236
Caudate	0.00633752	0.0523287

## Sheet: TableS8
The relationship between baseline CSF NPTX2 and longitudinal α-synuclein, as well as the dopaminergic degeneration
Independent	Dependent	Estimate	CI_lower	CI_upper	P_value	Std.Error	DF	t_value
High vs. Low NPTX2	Caudate	0.00166726	-0.0169333	0.0202678	0.860424	0.00947976	1094	0.175876
High vs. Low NPTX2	Putamen	-0.00487731	-0.0149119	0.00515725	0.340447	0.0051141	1094	-0.953698
High vs. Low NPTX2	Striatum	-0.00158671	-0.014389	0.0112156	0.807907	0.00652466	1094	-0.243186
High vs. Low NPTX2	α-syn	-0.0397622	-0.0968845	0.01736	0.172214	0.029102	830	-1.3663
NPTX1	Caudate	0.000698209	-0.00854769	0.00994411	0.882235	0.00471216	1094	0.148172
NPTX1	Putamen	-0.000208322	-0.00519832	0.00478167	0.934729	0.00254315	1094	-0.0819153
NPTX1	Striatum	0.000268996	-0.00609456	0.00663255	0.933913	0.00324318	1094	0.0829422
NPTX1	α-syn	-0.0330056	-0.0616252	-0.00438586	0.0238548	0.0145809	830	-2.26362
NPTX2	Caudate	0.00390935	-0.00457535	0.012394	0.366163	0.00432422	1094	0.904059
NPTX2	Putamen	7.96725e-06	-0.00457337	0.0045893	0.997278	0.00233487	1094	0.00341228
NPTX2	Striatum	0.00198881	-0.00385182	0.00782944	0.50419	0.00297667	1094	0.668132
NPTX2	α-syn	-0.0270418	-0.0527398	-0.00134383	0.0391886	0.0130923	830	-2.06547
NPTXR	Caudate	0.00164833	-0.0103041	0.0136008	0.786755	0.00609156	1094	0.270593
NPTXR	Putamen	-0.0012402	-0.00769171	0.00521131	0.706107	0.00328801	1094	-0.377188
NPTXR	Striatum	0.000339953	-0.00788726	0.00856716	0.935396	0.00419299	1094	0.0810766
NPTXR	α-syn	-0.0358268	-0.0734624	0.00180885	0.0620461	0.0191742	830	-1.86849

[truncated: 17 more sheets: TableS9, TableS10, TableS11, TableS12, TableS13, TableS14, TableS15, TableS16, tableS17, tableS18, tableS19, TableS20, TableS21, TableS22, TableS23, tableS24, tableS25]
