# Supplementary material for: CSF NPTX2 reflects α-synuclein pathology and predicts disease progression in Parkinson’s disease
Source: Research Square preprint supplement (doi:10.21203/rs.3.rs-8386534/v1), 2025-12-30
Supplement: Supplementary file 1 [file c7b3ef328472348df0fec96e.pdf]

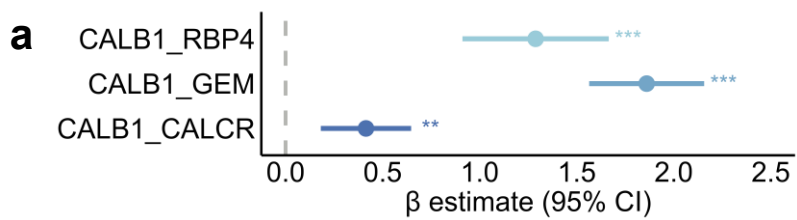

**Fig.S1 Elevated NPTX2 expression in PD dopaminergic neurons. a** Forest plots showed increased expression of NPTX2 in the single-cell RNA sequence in dopaminergic neurons of PD.

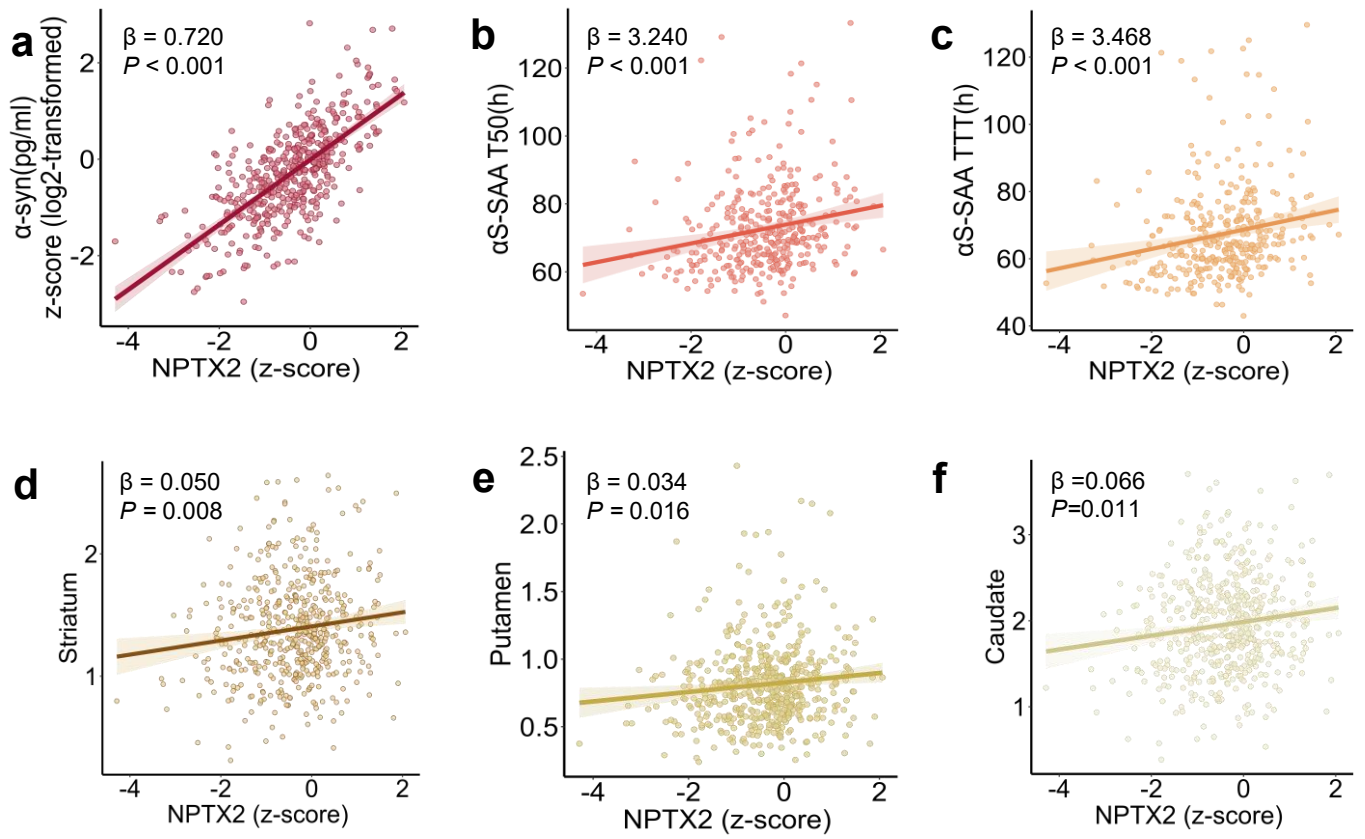

**Fig.S2 The baseline relationship between CSF NPTX2 and  $\alpha$ -synuclein, as well as the dopaminergic degeneration. a-f** Scatterplots showing the correlation between NPTX2 and total  $\alpha$ -syn amounts in CSF (**a**), the time to 50% max fluorescence (T50%) of  $\alpha$ -syn SAA (**b**), the time to threshold (TTT) of  $\alpha$ -syn SAA (**c**), mean striatum binding ratio(**d**), mean putamen binding ratio(**e**), and mean caudate binding ratio(**f**) in patients with PD. Measurements were adjusted for age, sex, apolipoprotein E  $\epsilon 4$  status, LEDD, baseline Hoehn-Yahr stage, and disease duration. Linear trend lines are shown, and the 95% confidence intervals are indicated by shading. h = hours; SAA, seed amplification assay.

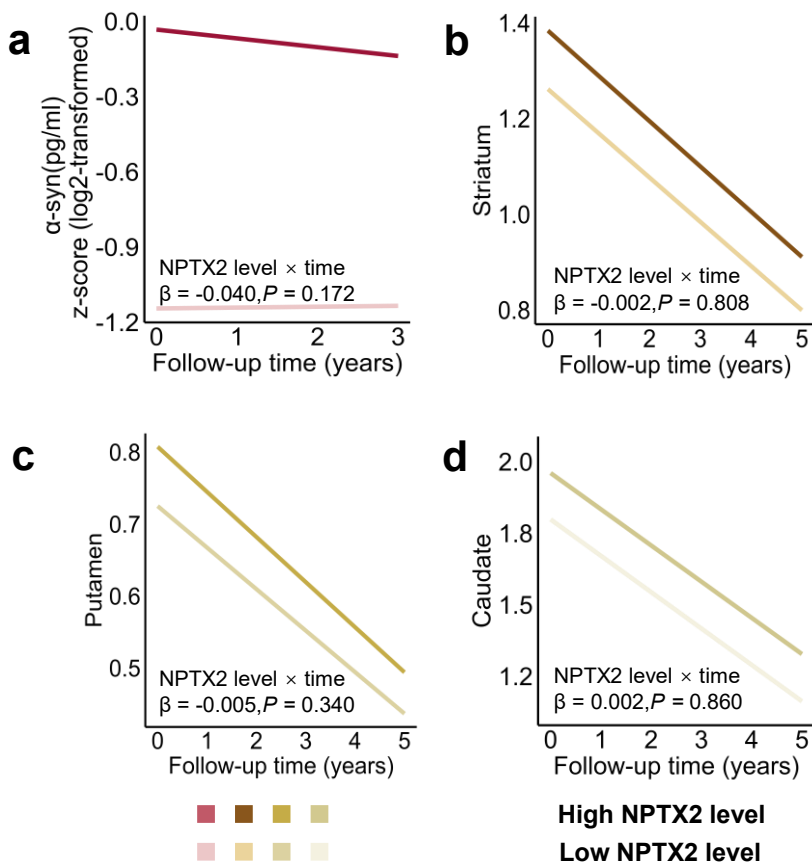

**Fig.S3 The relationship between baseline CSF NPTX2 and longitudinal  $\alpha$ -synuclein, as well as the dopaminergic degeneration.** a-d LMMs were used to examine effects of baseline CSF NPTX2 levels with follow-up time on CSF longitudinal  $\alpha$ -synuclein(a), mean striatum binding ratio(b), mean putamen binding ratio (c), and mean caudate binding ratio(d). Measurements were adjusted for age, sex, apolipoprotein E  $\epsilon$ 4 status, LEDD, baseline Hoehn-Yahr stage, and disease duration.

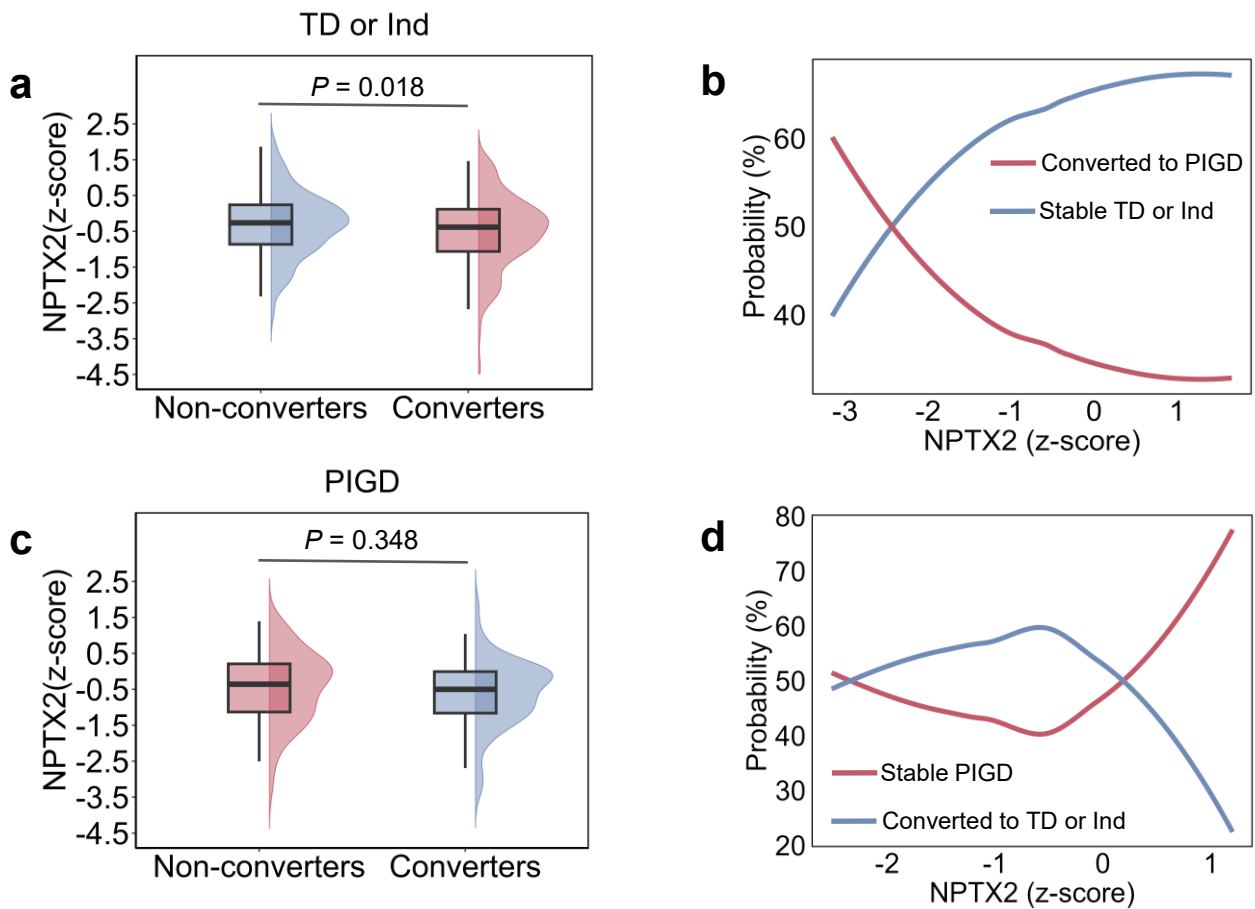

**Fig.S4 Baseline CSF NPTX2 predict motor subtype conversion.** **a, c** Baseline CSF NPTX2 was compared in non-converters and converters at baseline TD group (**a**) and PIGD group (**c**). Multivariate linear regression were used for group comparison. **b, d** Relationship between baseline CSF GFAP and the probability of TD (**b**) and PIGD (**d**) motor subtypes after correction for confounders. The confounders including age, sex, apolipoprotein E  $\epsilon 4$  status, LEDD, baseline Hoehn-Yahr stage, and disease duration. NPTX2, Neuronal pentraxin II; TD, tremor dominant; Ind, indeterminate, PIGD, postural instability and gait disturbance.

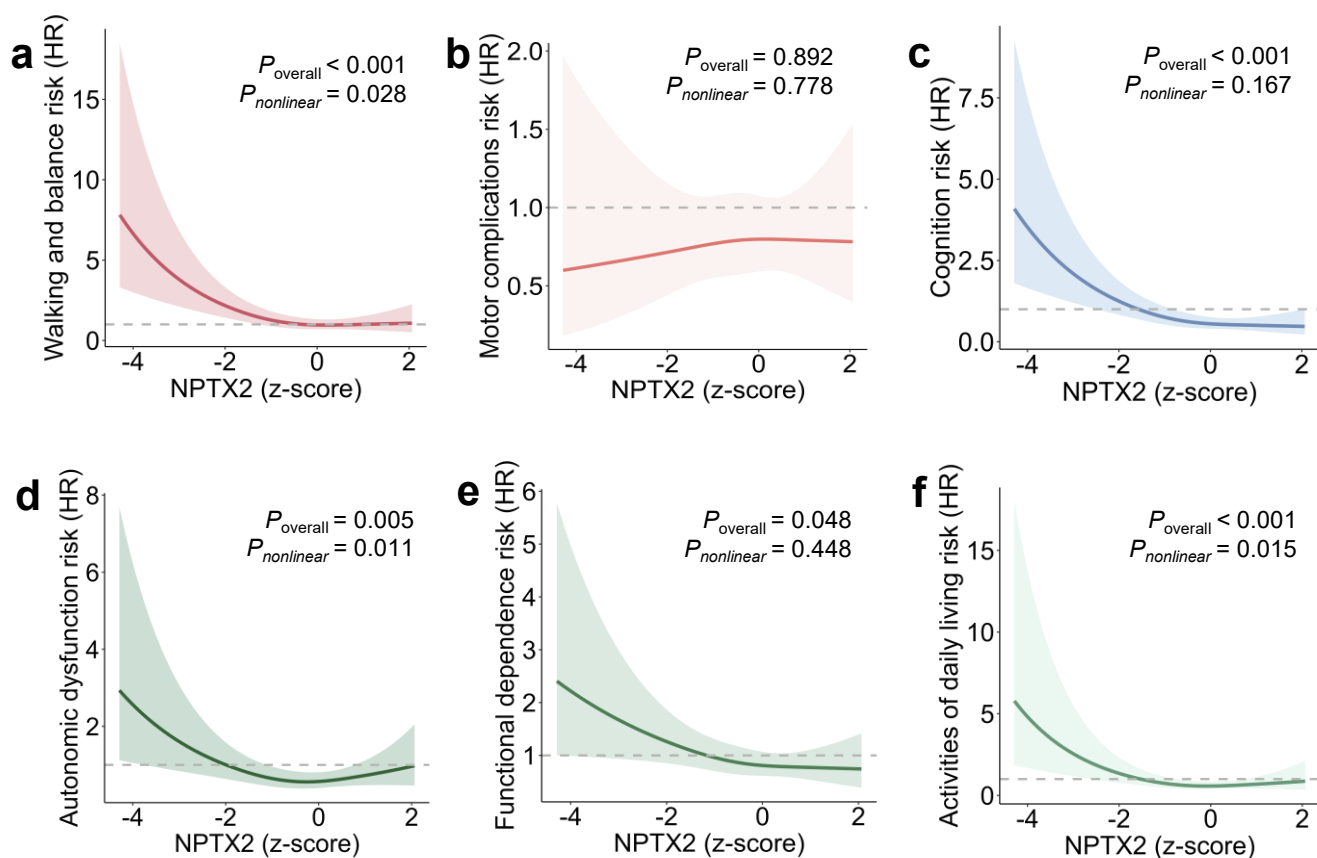

**Fig.S5 CSF NPTX2 level were nonlinearly associated with progression milestones in PD**

**a-f** Using Cox regression model with RCS to explore non-linear relationship between CSF NPTX2 levels and the milestones of Parkinson's Disease progression. Walking and balance(**a**); Motor complications(**b**); Cognition(**c**); Autonomic dysfunction(**d**); Functional dependence(**e**); Activities of daily living(**f**). The analyses were adjusted for age, sex, apolipoprotein E  $\epsilon 4$  status, LEDD, baseline Hoehn-Yahr stage, and disease duration. In addition, in terms of cognition, the model also corrected Baseline MoCA score and education.

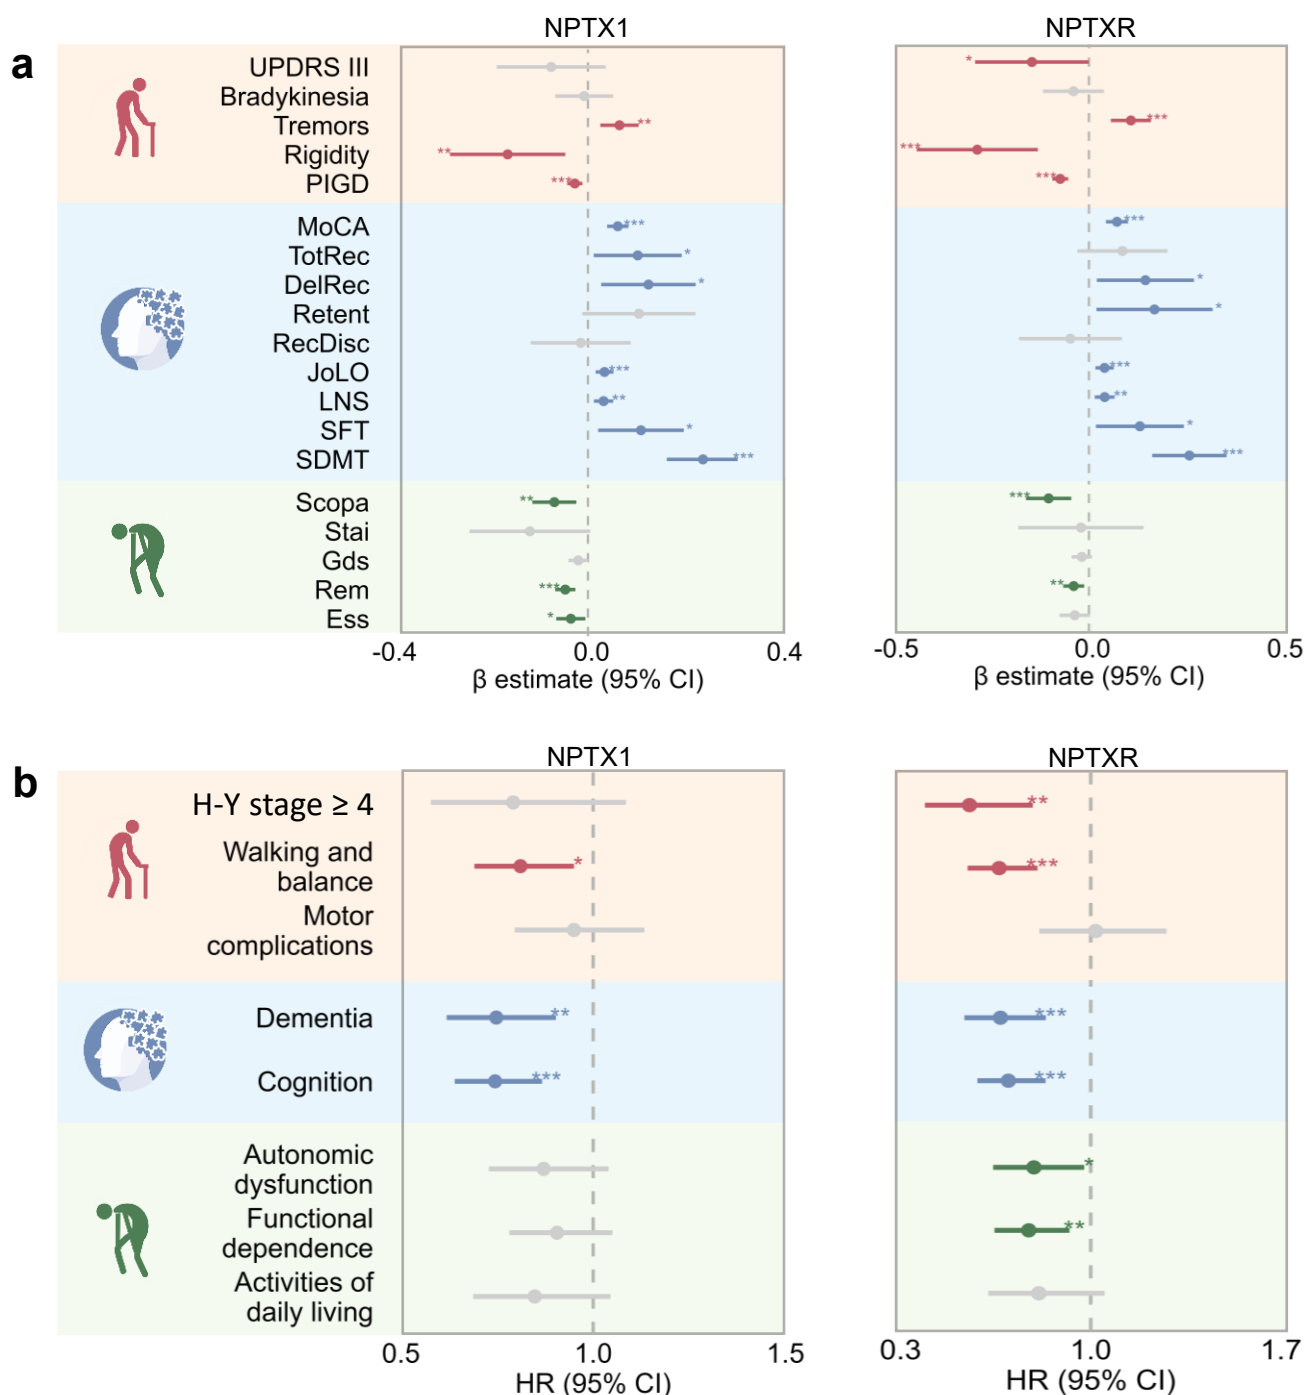

**Fig.S6 Effects of NPTX1 and NPTXR on longitudinal symptoms in Parkinson's disease. a**

LMMs were used to examine effects of baseline CSF NPTX1 level and NPTXR level with follow-up time on longitudinal symptoms. **b** Cox proportional hazards models provided evidence of associations between CSF NPTX1 level and CSF NPTXR level and incident Hoehn-Yahr stage  $\geq 4$ , incident dementia or the milestones of PD. LMM, linear mixed model; dementia, MoCA  $< 22$ ; TotRec, HVLT Immediate/Total Recognition Index t-score; JoLO, the Benton Judgment of Line OrientRecall t-score; DelRec, HVLT Delayed Recall t-score; Retent, HVLT Retention t-score; RecDisc, HVLT Discrimination ation, LNS, the Letter Number Sequencing; SFT, the Semantic Fluency Test; SDMT, Symbol Digit Modalities Test; Scopa, SCOPA-AUT Total Score; Stai, State-Trait Anxiety Index (STAI) Total Score; H-Y stage, Hoehn-Yahr stage.

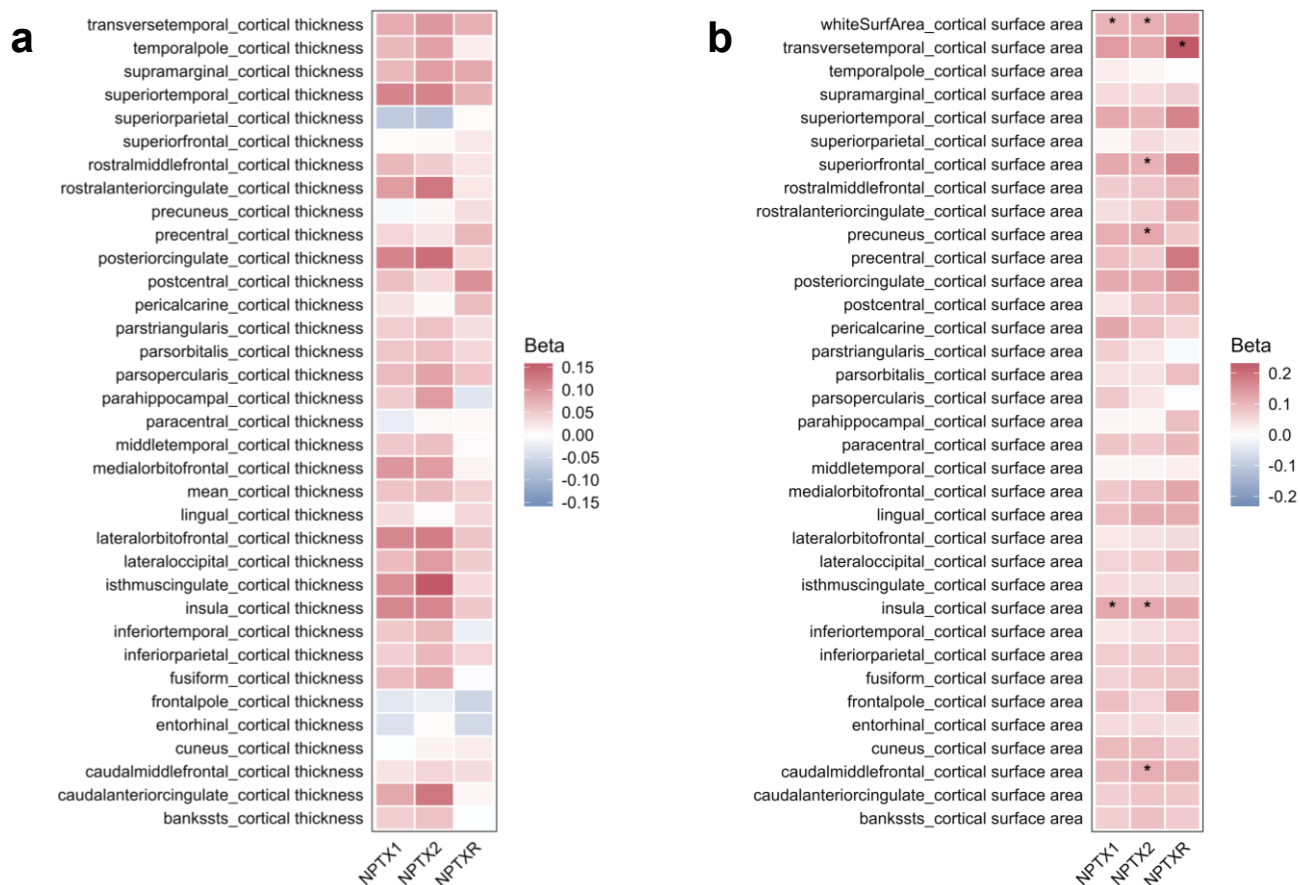

**Fig.S7 The baseline relationship between CSF NPTX2 and brain cortical thickness and cortical surface area.** **a** Heatmap showing baseline associations between CSF NPTXs and brain cortical thickness. **b** Heatmap showing baseline associations between CSF NPTXs and brain cortical surface area. The analyses were adjusted for age, sex, apolipoprotein E  $\epsilon$ 4 status, LEDD, baseline Hoehn-Yahr stage, disease duration, signal-to-noise ratio. For the cortical surface area, the model additionally adjusted for intracranial volume. Significant associations were determined with FDR-adjusted  $P$  value  $< 0.05$ . (\*FDR-adjusted  $P$  value  $< 0.05$ , \*\* FDR-adjusted  $P$  value  $< 0.01$ , and \*\*\* FDR-adjusted  $P$  value  $< 0.001$ )

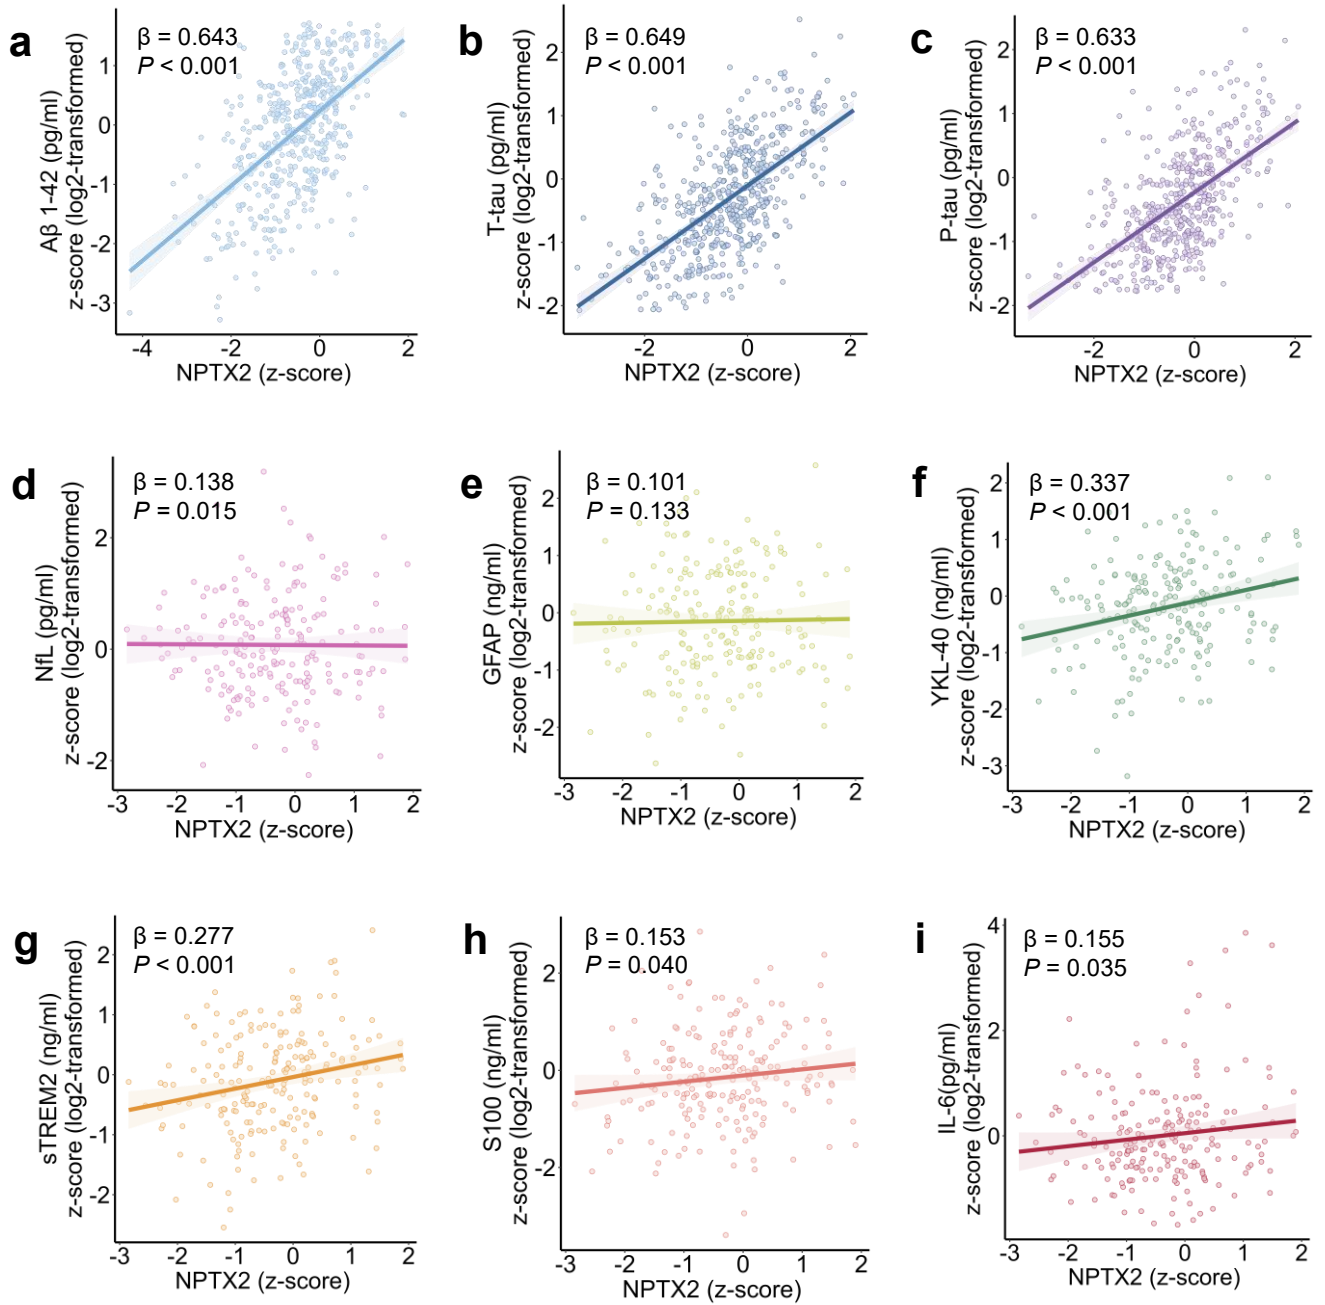

**Fig.S8 The baseline relationship between CSF NPTX2 and CSF biomarkers.** **a-i** Scatterplots showing the correlation between NPTX2 and A $\beta_{1-42}$ (**a**), T-tau(**b**), P-tau(**c**), NfL(**d**), GFAP(**e**), YKL-40(**f**), sTREM2(**g**), S100(**h**), IL-6(**i**) in patients with PD. Measurements were adjusted for age, sex, apolipoprotein E  $\epsilon$ 4 status, LEDD, baseline Hoehn-Yahr stage, disease duration, baseline MoCA scores and education. Linear trend lines are shown, and the 95% confidence intervals are indicated by shading. A $\beta_{1-42}$ , Amyloid-beta (1-42); T-tau, total tau; P-tau, tau phosphorylated at the threonine181 position (p-tau181); GFAP, Glial fibrillary acid protein; YKL-40, Chitinase-3-like Protein 1; sTREM2, Soluble triggering receptor expressed on myeloid cells 2; S100, S100 calcium binding protein B; IL-6, Interleukin 6.



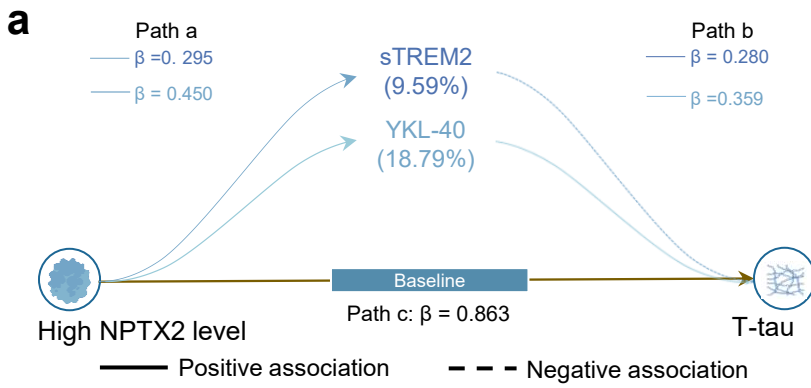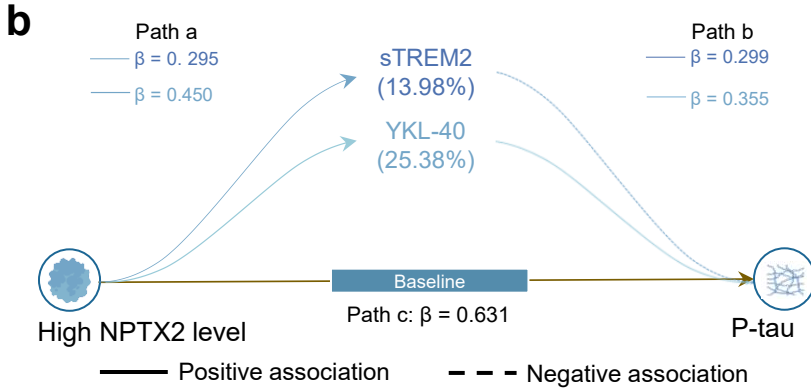

**Fig.S9 Mediation of the association between CSF NPTX2 and tau pathology by sTREM2 and YKL-40. a, b** sTREM2 and YKL-40 significantly mediated the association between CSF NPTX2 level and T-tau(**a**) and P-tau (**b**). Model were adjusted for age, sex, apolipoprotein E  $\epsilon 4$  status, LEDD, baseline Hoehn-Yahr stage, disease duration, baseline MoCA scores and education.
